# Supplementary material for: Polysaccharide from Ganoderma sinense improves cognitive capacity in a mouse model of Alzheimer’s disease via reshaping the gut microbiota and short-chain fatty acid metabolism
Source: Research Square preprint supplement (doi:10.21203/rs.3.rs-5223861/v1), 2024-12-10
Supplement: Supplementary file 1 [file 2a90c065f79a52e38dfdfe48.docx]

Supplementary Table4

Quantitative analysis of ScFAs

| Group | Sample volume | Isobutyric acid（μg/g） | Acetic acid（μg/g） | Butyric acid（μg/g） | Isovaleric acid（μg/g） | Valeric acid（μg/g） | Caproic acid（μg/g） | Propionic acid（μg/g） |
| --- | --- | --- | --- | --- | --- | --- | --- | --- |
| Model_1 | 50.5mg | 33.6109 | 1746.848 | 760.1273 | 24.386 | 48.4898 | 0.3373 | 297.8061 |
| Model_2 | 50mg | 56.7629 | 1516.9289 | 765.8555 | 46.629 | 52.2522 | 0.4466 | 255.1726 |
| Model_3 | 49.8mg | 54.9837 | 1631.8466 | 679.9266 | 40.2465 | 66.2752 | 0.3129 | 461.2646 |
| Model_4 | 49.1mg | 65.5638 | 1672.0258 | 715.786 | 55.1077 | 67.6009 | 0.1978 | 312.502 |
| Model_5 | 50mg | 48.3994 | 1895.458 | 709.968 | 29.0313 | 52.5191 | 0.3059 | 293.425 |
| GSP1_1 | 49.3mg | 33.6349 | 1759.6912 | 744.1393 | 20.1294 | 46.4111 | 1.3564 | 283.7834 |
| GSP1_2 | 50.9mg | 47.3072 | 941.2846 | 343.5063 | 41.347 | 40.6896 | 0.1718 | 299.4353 |
| GSP1_3 | 50.6mg | 43.6682 | 1707.3588 | 467.7182 | 33.3963 | 47.8404 | 0.2714 | 386.149 |
| GSP1_4 | 50.4mg | 38.6048 | 1178.0392 | 638.1369 | 28.015 | 43.297 | 0.1806 | 356.0417 |
| GSP1_5 | 50.3mg | 41.969 | 1506.7108 | 316.1721 | 39.1612 | 44.4434 | ND | 459.4244 |
| CTRL_1 | 50.4mg | 20.807 | 1951.3179 | 1012.0812 | 8.4368 | 30.9498 | 0.005741 | 200.0252 |
| CTRL_2 | 49.7mg | 17.3267 | 1999.776 | 1460.1908 | 7.2165 | 41.6125 | 0.2944 | 199.7747 |
| CTRL_3 | 49.8mg | 22.1639 | 1598.6098 | 897.0039 | 10.948 | 40.5736 | ND | 480.5779 |
| CTRL_4 | 50.2mg | 36.8453 | 2014.6374 | 1211.1568 | 19.039 | 56.6716 | 0.04896 | 418.1633 |
| CTRL_5 | 50.1mg | 27.0446 | 1926.8757 | 582.0786 | 17.1498 | 60.6659 | 0.3604 | 396.6635 |

Note：Results below the minimum limit of quantification are marked in gray.
