# Supplementary material for: Polysaccharide from Ganoderma sinense improves cognitive capacity in a mouse model of Alzheimer’s disease via reshaping the gut microbiota and short-chain fatty acid metabolism
Source: Research Square preprint supplement (doi:10.21203/rs.3.rs-5223861/v1), 2024-12-10
Supplement: Supplementary file 2 [file 2b309ae108b02d212be28544.docx]

Supplementary Table2

Monosaccharide composition of GSP2

| monosaccharide standards | unit | data | molecular weight | Quantity of substances(mmol/kg) | Proportion |
| --- | --- | --- | --- | --- | --- |
| [L](https://cn.bing.com/dict/search?q=L&FORM=BDVSP6&cc=cn)-[Guluronic](https://cn.bing.com/dict/search?q=Guluronic&FORM=BDVSP6&cc=cn) [acid](https://cn.bing.com/dict/search?q=acid&FORM=BDVSP6&cc=cn) | mg/kg | 117.01 | 194.14 | 0.60 | 0.0270% |
| [D](https://cn.bing.com/dict/search?q=D&FORM=BDVSP6&cc=cn)-[mannuronic](https://cn.bing.com/dict/search?q=mannuronic&FORM=BDVSP6&cc=cn) | mg/kg | 24.49 | 194.14 | 0.13 | 0.0057% |
| [D](https://cn.bing.com/dict/search?q=D&FORM=BDVSP6&cc=cn)-[Mannose](https://cn.bing.com/dict/search?q=Mannose&FORM=BDVSP6&cc=cn) | mg/kg | 1416.33 | 180.16 | 7.86 | 0.3271% |
| D-glucosamine | mg/kg | 106.12 | 179.17 | 0.59 | 0.0245% |
| D-Ribose | mg/kg | 53.06 | 150.13 | 0.35 | 0.0123% |
| [L](https://cn.bing.com/dict/search?q=L&FORM=BDVSP6&cc=cn)-[Rhamnose](https://cn.bing.com/dict/search?q=Rhamnose&FORM=BDVSP6&cc=cn) | mg/kg | 136.05 | 182.17 | 0.75 | 0.0314% |
| [D](https://cn.bing.com/dict/search?q=D&FORM=BDVSP6&cc=cn)-[glucuronic](https://cn.bing.com/dict/search?q=glucuronic&FORM=BDVSP6&cc=cn) [acid](https://cn.bing.com/dict/search?q=acid&FORM=BDVSP6&cc=cn) | mg/kg | 224.49 | 194.14 | 1.16 | 0.0519% |
| [galacturonic](https://cn.bing.com/dict/search?q=galacturonic&FORM=BDVSP6&cc=cn) [acid](https://cn.bing.com/dict/search?q=acid&FORM=BDVSP6&cc=cn); | mg/kg | 3096.6 | 194.14 | 15.95 | 0.7152% |
| [galactosaminide](https://cn.bing.com/dict/search?q=galactosaminide&FORM=BDVSP6&cc=cn) | mg/kg | 503.4 | 281.22 | 1.79 | 0.1163% |
| [glucose](https://cn.bing.com/dict/search?q=glucose&FORM=BDVSP6&cc=cn) | mg/kg | 424341.5 | 180.16 | 2355.36 | 98.0127% |
| [N](https://cn.bing.com/dict/search?q=N&FORM=BDVSP6&cc=cn)[-](https://cn.bing.com/dict/search?q=-&FORM=BDVSP6&cc=cn)acetylgalactosaminyltransferase | mg/kg | 1736.05 | 221.21 | 7.85 | 0.4010% |
| [D](https://cn.bing.com/dict/search?q=D&FORM=BDVSP6&cc=cn)-[galactose](https://cn.bing.com/dict/search?q=galactose&FORM=BDVSP6&cc=cn) | mg/kg | 35.37 | 180.16 | 0.20 | 0.0082% |
| D-[xylose](https://cn.bing.com/dict/search?q=xylose&FORM=BDVSP6&cc=cn) | mg/kg | 336.05 | 150.13 | 2.24 | 0.0776% |
| D-arabinose | mg/kg | 819.05 | 150.13 | 5.46 | 0.1892% |
| L-[fucose](https://cn.bing.com/dict/search?q=fucose&FORM=BDVSP6&cc=cn) | mg/kg | Not detected（<1.200） | / | / | / |
