# Supplementary material for: Polysaccharide from Ganoderma sinense improves cognitive capacity in a mouse model of Alzheimer’s disease via reshaping the gut microbiota and short-chain fatty acid metabolism
Source: Research Square preprint supplement (doi:10.21203/rs.3.rs-5223861/v1), 2024-12-10
Supplement: Supplementary file 3 [file d51432b605c90076a678ee6d.docx]

Supplementary Table1

Monosaccharide composition of GSP1

| monosaccharide standards | unit | data | molecular weight | Quantity of substances(mmol/kg) | Proportion |
| --- | --- | --- | --- | --- | --- |
| [L](https://cn.bing.com/dict/search?q=L&FORM=BDVSP6&cc=cn)-[Guluronic](https://cn.bing.com/dict/search?q=Guluronic&FORM=BDVSP6&cc=cn) [acid](https://cn.bing.com/dict/search?q=acid&FORM=BDVSP6&cc=cn) | mg/kg | 88.61 | 194.14 | 0.46 | 0.0266% |
| [D](https://cn.bing.com/dict/search?q=D&FORM=BDVSP6&cc=cn)-[mannuronic](https://cn.bing.com/dict/search?q=mannuronic&FORM=BDVSP6&cc=cn) | mg/kg | 2283.54 | 194.14 | 11.76 | 0.6860% |
| [D](https://cn.bing.com/dict/search?q=D&FORM=BDVSP6&cc=cn)-[Mannose](https://cn.bing.com/dict/search?q=Mannose&FORM=BDVSP6&cc=cn) | mg/kg | 1540.51 | 180.16 | 8.55 | 0.4628% |
| D-glucosamine | mg/kg | 849.37 | 179.17 | 4.74 | 0.2552% |
| D-Ribose | mg/kg | 64.56 | 150.13 | 0.43 | 0.0194% |
| [L](https://cn.bing.com/dict/search?q=L&FORM=BDVSP6&cc=cn)-[Rhamnose](https://cn.bing.com/dict/search?q=Rhamnose&FORM=BDVSP6&cc=cn) | mg/kg | 506.33 | 182.17 | 2.78 | 0.1521% |
| [D](https://cn.bing.com/dict/search?q=D&FORM=BDVSP6&cc=cn)-[glucuronic](https://cn.bing.com/dict/search?q=glucuronic&FORM=BDVSP6&cc=cn) [acid](https://cn.bing.com/dict/search?q=acid&FORM=BDVSP6&cc=cn) | mg/kg | 194.94 | 194.14 | 1.00 | 0.0586% |
| [galacturonic](https://cn.bing.com/dict/search?q=galacturonic&FORM=BDVSP6&cc=cn) [acid](https://cn.bing.com/dict/search?q=acid&FORM=BDVSP6&cc=cn); | mg/kg | 3277.22 | 194.14 | 16.88 | 0.9845% |
| [galactosaminide](https://cn.bing.com/dict/search?q=galactosaminide&FORM=BDVSP6&cc=cn) | mg/kg | 388.61 | 281.22 | 1.38 | 0.1167% |
| [glucose](https://cn.bing.com/dict/search?q=glucose&FORM=BDVSP6&cc=cn) | mg/kg | 319755.7 | 180.16 | 1774.84 | 96.0585% |
| [N](https://cn.bing.com/dict/search?q=N&FORM=BDVSP6&cc=cn)[-](https://cn.bing.com/dict/search?q=-&FORM=BDVSP6&cc=cn)acetylgalactosaminyltransferase | mg/kg | 2236.71 | 221.21 | 10.11 | 0.6719% |
| [D](https://cn.bing.com/dict/search?q=D&FORM=BDVSP6&cc=cn)-[galactose](https://cn.bing.com/dict/search?q=galactose&FORM=BDVSP6&cc=cn) | mg/kg | 777.22 | 180.16 | 4.31 | 0.2335% |
| D-[xylose](https://cn.bing.com/dict/search?q=xylose&FORM=BDVSP6&cc=cn) | mg/kg | 482.28 | 150.13 | 3.21 | 0.1449% |
| D-arabinose | mg/kg | 430.38 | 150.13 | 2.87 | 0.1293% |
| L-[fucose](https://cn.bing.com/dict/search?q=fucose&FORM=BDVSP6&cc=cn) | mg/kg | Not detected（<1.200） | / | / | / |
