# Supplementary material for: Polysaccharide from Ganoderma sinense improves cognitive capacity in a mouse model of Alzheimer’s disease via reshaping the gut microbiota and short-chain fatty acid metabolism
Source: Research Square preprint supplement (doi:10.21203/rs.3.rs-5223861/v1), 2024-12-10
Supplement: Supplementary file 4 [file db9d0703513ae862faee1c21.docx]

Supplementary Table5

Behavioral data

| name | Lateney（s） | Number of target platform crossings | Dwelling time in the target quadrant（s） | Distance traveled in the target quadrant（cm） | Nestlet building score | Object recognition test（RI） |
| --- | --- | --- | --- | --- | --- | --- |
| CTRL_1 | 15.8 | 6 | 78.8 | 68 | 5 | 0.854368932 |
| CTRL_2 | 19.7 | 5 | 28.9 | 28.8 | 5 | 0.950173812 |
| CTRL_3 | 25.8 | 1 | 36.5 | 41.2 | 4 | 0.950747902 |
| CTRL_4 | 27.8 | 3 | 26.2 | 28.6 | 5 | 0.835661463 |
| CTRL_5 | 19.5 | 3 | 45.7 | 38.5 | 5 | 0.819004525 |
| Model_1 | 60.1 | 1 | 16.4 | 19.4 | 1 | 0.197190166 |
| Model_2 | 50.8 | 1 | 16 | 19 | 2 | 0.525316456 |
| Model_3 | 60.1 | 1 | 11.3 | 10.7 | 1 | 0.578705477 |
| Model_4 | 60.1 | 1 | 22.8 | 25.2 | 2 | 0.285714286 |
| Model_5 | 60.1 | 2 | 26.5 | 25.8 | 2 | 0.337748344 |
| GSP1_1 | 14.3 | 2 | 25.7 | 28.3 | 4 | 0.928660826 |
| GSP1_2 | 38.6 | 3 | 27.4 | 25.5 | 2 | 0.712093533 |
| GSP1_3 | 25 | 2 | 25.6 | 30.2 | 3 | 0.756676558 |
| GSP1_4 | 29.8 | 1 | 42.6 | 38.4 | 4 | 0.684007707 |
| GSP1_5 | 24.6 | 4 | 37.9 | 37 | 5 | 0.568584071 |
