# Supplementary material for: Polysaccharide from Ganoderma sinense improves cognitive capacity in a mouse model of Alzheimer’s disease via reshaping the gut microbiota and short-chain fatty acid metabolism
Source: Research Square preprint supplement (doi:10.21203/rs.3.rs-5223861/v1), 2024-12-10
Supplement: Supplementary file 5 [file ec01c687c40d0e56ee084794.xlsx]

## Sheet: Sheet1
name	CTRL_1	CTRL_2	CTRL_3	CTRL_4	CTRL_5	Model_1	Model_2	Model_3	Model_4	Model_5	GSP1_1	GSP1_2	GSP1_3	GSP1_4	GSP1_5
d__Bacteria;p__Firmicutes;c__Bacilli;o__Lactobacillales;f__Lactobacillaceae;g__Lactobacillus	0.285731	0.419829	0.550462	0.43349	0.343867	0.165468	0.124283	0.299216	0.104622	0.326042	0.24909	0.12239	0.19707	0.195788	0.112865
d__Bacteria;p__Firmicutes;c__Clostridia;o__Clostridiales;f__unidentified_Clostridiales;g__unidentified_Clostridiales	0.0673113	0.0470102	0.00291265	0.0298547	0.0268546	0.0987388	0.0855154	0.101185	0.11572	0.0797483	0.144205	0.161099	0.165293	0.20339	0.140069
d__Bacteria;p__Firmicutes;c__Clostridia;o__Clostridiales;f__Lachnospiraceae;g__unidentified_Lachnospiraceae	0.108525	0.0388256	0.0072525	0.030845	0.0399616	0.139458	0.200012	0.0880203	0.146943	0.111176	0.0951854	0.204468	0.113826	0.0751172	0.0535928
d__Bacteria;p__Firmicutes;c__Clostridia;o__Clostridiales;f__Lachnospiraceae;g__unclassified_Lachnospiraceae	0.0589229	0.0545831	0.0685055	0.00550491	0.0272915	0.207119	0.11936	0.140011	0.06102	0.186235	0.0883698	0.0360877	0.084496	0.0153205	0.0494277
d__Bacteria;p__Bacteroidetes;c__Bacteroidia;o__Bacteroidales;f__S24-7;g__unidentified_S24-7	0.00474762	0.00265051	0.00192235	0.0121749	0.0303789	0.0421169	0.0407771	0.0718842	0.039845	0.0183206	0.0462237	0.0998456	0.0987097	0.169429	0.216701
d__Bacteria;p__Firmicutes;c__Clostridia;o__Clostridiales;f__unclassified_Clostridiales;g__unclassified_Clostridiales	0.0568258	0.0456412	0.00908747	0.112778	0.0613695	0.0400198	0.0483791	0.0540588	0.0551656	0.0560685	0.0317188	0.0898261	0.0428451	0.0427868	0.0329421
d__Bacteria;p__Actinobacteria;c__Actinobacteria;o__Actinomycetales;f__Corynebacteriaceae;g__Corynebacterium	0.0159613	0.147176	0.150409	0.153468	0.188186	0.000815542	0.00049515	0.000262138	5.8253e-05	0.000262138	0.00967	0.00262138	0.00381557	0.00343693	0.0072525
d__Bacteria;p__Proteobacteria;c__Deltaproteobacteria;o__Desulfovibrionales;f__Desulfovibrionaceae;g__Desulfovibrio	0.0815542	0.0156701	0.0401946	0.0167186	0.0238837	0.0142137	0.0172138	0.0122623	0.00579617	0.0163691	0.0669036	0.00541753	0.0975738	0.00547578	0.0910203
d__Bacteria;p__Firmicutes;c__Clostridia;o__Clostridiales;f__Ruminococcaceae;g__Oscillospira	0.00777677	0.00515539	0.00463111	0.00766027	0.00841756	0.0239129	0.0487578	0.0401654	0.0882242	0.0328838	0.0188157	0.0700784	0.0525151	0.0438936	0.0422625
d__Bacteria;p__Firmicutes;c__Bacilli;o__Bacillales;f__Staphylococcaceae;g__Staphylococcus	0.0784668	0.0635831	0.0211458	0.0236798	0.0223109	0	0	0	0	0	0.055719	0.0131069	0.014971	0.0143302	0.0352431
d__Bacteria;p__Firmicutes;c__Clostridia;o__Clostridiales;f__Lachnospiraceae;g__[Ruminococcus]	0.0562433	0.0086797	0.00346605	0.00486412	0.0105729	0.020039	0.0244954	0.0166604	0.0270585	0.024874	0.00946611	0.026709	0.0221944	0.00460199	0.0321557
d__Bacteria;p__Bacteroidetes;c__Bacteroidia;o__Bacteroidales;f__Rikenellaceae;g__unidentified_Rikenellaceae	0.00664084	0.0163982	0.000873795	0.00498063	0.00334955	0.0325343	0.0558064	0.00372819	0.0877873	0.0201847	0.00602918	0.00305828	0.00760202	0.0111263	0.0117962
d__Bacteria;p__Bacteroidetes;c__Bacteroidia;o__Bacteroidales;f__[Odoribacteraceae];g__Odoribacter	0.0108933	0.00629132	0.00136895	0.00800979	0.00908747	0.0576996	0.0463403	0.00244663	0.0644569	0.0043981	0.00212623	0.00585443	0.0109516	0.00209711	0.00777677
d__Bacteria;p__Bacteroidetes;c__Bacteroidia;o__Bacteroidales;f__Rikenellaceae;g__Rikenella	0.00888358	0.0146506	0.00850494	0.0184953	0.00518452	0.0187575	0.026243	0.0108933	0.0171846	0.00588355	0.0138933	0.0411849	0.00771852	0.0110972	0.000407771
d__Bacteria;p__Actinobacteria;c__Coriobacteriia;o__Coriobacteriales;f__Coriobacteriaceae;g__Adlercreutzia	0.0190487	0.00934961	0.00920397	0.00996126	0.00506801	0.0257187	0.00818455	0.0232138	0.0082428	0.0207089	0.0205342	0.00556316	0.00859232	0.00664084	0.0119127
d__Bacteria;p__Proteobacteria;c__Deltaproteobacteria;o__Desulfovibrionales;f__Desulfovibrionaceae;g__unidentified_Desulfovibrionaceae	0.00058253	0.00448548	5.8253e-05	0.000466024	0.00192235	0.0163691	0.033146	0.0114467	0.0351848	0.00975738	0.0100778	0.0230391	0.00163108	0.0198351	0.000669909
d__Bacteria;p__Firmicutes;c__Erysipelotrichi;o__Erysipelotrichales;f__Erysipelotrichaceae;g__unidentified_Erysipelotrichaceae	0.00259226	0.00302916	0.039612	0.0369033	0.00122331	0.00355343	0.00661171	0.0117089	0.00460199	0.0039612	0.00602918	0.00422334	0.000233012	0.0131069	0.00168934
d__Bacteria;p__Actinobacteria;c__Actinobacteria;o__Actinomycetales;f__Dermabacteraceae;g__Brachybacterium	0	0.0288935	0.0272041	0.0273789	0.033379	0	0	0	0	0	0	0	0	0	0
d__Bacteria;p__Bacteroidetes;c__Bacteroidia;o__Bacteroidales;f__[Paraprevotellaceae];g__[Prevotella]	0	0	0.0015437	0.000349518	0.0126992	0.00669909	0.00719424	0.0164565	0.0270294	0.000233012	0	0.00294178	0.00302916	0.00687385	0.0300003
d__Bacteria;p__Firmicutes;c__Clostridia;o__Clostridiales;f__Lachnospiraceae;g__Coprococcus	0.00349518	0.000990301	0.000262138	0.0018641	0.000728162	0.00148545	0.0101651	0.0262138	0.0101943	0.00369907	0.0237381	0.0132817	0.00445635	0.00818455	0.00227187
d__Bacteria;p__Proteobacteria;c__Epsilonproteobacteria;o__Campylobacterales;f__Helicobacteraceae;g__Helicobacter	0	0.000553403	5.8253e-05	0.000873795	2.91265e-05	0.00107768	0.0019806	5.8253e-05	0.0313692	0.00122331	0.000932048	0.000699036	0.000262138	0.0667871	0.00101943
d__Bacteria;p__Firmicutes;c__Bacilli;o__Turicibacterales;f__Turicibacteraceae;g__Turicibacter	0.0408936	0.00763114	0.00227187	0.00620394	0.00713599	0	0	8.73795e-05	0.000116506	0	0.0107768	0.00419422	0.00521364	0.00541753	0.0160778
d__Bacteria;p__Firmicutes;c__Clostridia;o__Clostridiales;f__Ruminococcaceae;g__Ruminococcus	0.0107768	0.00486412	0.00203885	0.00171846	0.00393208	0.0128448	0.0086797	0.000932048	0.00885445	0.0108642	0.00739813	0.00955349	0.00521364	0.00550491	0.00693211
d__Bacteria;p__TM7;c__TM7-3;o__CW040;f__F16;g__unidentified_F16	0.00364081	0.00180584	0.000786415	0.000815542	0.00203885	0.00838843	0.0125826	0.0157283	0.00049515	0.0212623	0.0136603	0.00163108	0.00675735	0.00180584	0.00270876
d__Bacteria;p__Bacteroidetes;c__Bacteroidia;o__Bacteroidales;f__Bacteroidaceae;g__Bacteroides	0.000203885	0.000436897	0.000407771	0.0049515	0.00451461	0.00509714	0.0222818	0.00314566	0.0169516	0.00276702	0.000233012	0.00850494	0.00209711	0.0140098	0.00346605
d__Bacteria;p__Firmicutes;c__Clostridia;o__Clostridiales;f__Dehalobacteriaceae;g__Dehalobacterium	0.000844668	0.00151458	0.0019806	0.00364081	0.00393208	0.00745638	0.00419422	0.00885445	0.00573792	0.00206798	0.00428159	0.00946611	0.00809717	0.00378644	0.00471849
d__Bacteria;p__Firmicutes;c__Bacilli;o__Lactobacillales;f__Enterococcaceae;g__Enterococcus	0	0.00757289	0.00865057	0.00634958	0.0279906	0.000174759	0	0	0	0	0	0	0	0	0
d__Bacteria;p__Firmicutes;c__Clostridia;o__Clostridiales;f__Clostridiaceae;g__unclassified_Clostridiaceae	0.00235925	0.000145632	0.000320391	0.00139807	0.00151458	0	0	0.000145632	0	8.73795e-05	0.00646608	0.000233012	0.00512626	0.00305828	0.0215536
d__Bacteria;p__Firmicutes;c__Clostridia;o__Clostridiales;f__Ruminococcaceae;g__unidentified_Ruminococcaceae	0.000786415	0.000611656	0.000786415	0.00119419	0.000233012	0.00259226	0.0043981	0.00468937	0.00168934	0.00486412	0.00107768	0.00425247	0.00442723	0.00235925	0.00605831
d__Bacteria;p__Bacteroidetes;c__Bacteroidia;o__Bacteroidales;f__unidentified_Bacteroidales;g__unidentified_Bacteroidales	0.000262138	0.000262138	0.00101943	0.00279614	0.00474762	0.0100195	0.00131069	0.000961174	0.00195148	0.00049515	0.000116506	0.00267964	0.00375732	0.00157283	0.00361169
d__Bacteria;p__Firmicutes;c__Clostridia;o__Clostridiales;f__[Mogibacteriaceae];g__unidentified_[Mogibacteriaceae]	0.00192235	0.000728162	0.000407771	0.00151458	0.00139807	0.00326217	0.00326217	0.00401946	0.0019806	0.0029709	0.00166021	0.00171846	0.00410684	0.00166021	0.00425247
d__Bacteria;p__Firmicutes;c__Clostridia;o__Clostridiales;f__Ruminococcaceae;g__Butyricicoccus	0.0038447	0.000611656	0.00128157	0.000233012	0.000757289	0.00480587	0.00352431	0.00364081	0.00323304	0.00643696	0.00227187	0.00160196	0	0.00230099	0
d__Bacteria;p__Firmicutes;c__Bacilli;o__Bacillales;f__Staphylococcaceae;g__Jeotgalicoccus	0.0126409	0.00413596	0.000757289	0.00110681	0.00716512	0	0	0	0	0	0.00407771	0.000699036	0.000757289	0.000932048	0.00192235
d__Bacteria;p__Firmicutes;c__Bacilli;o__Lactobacillales;f__Leuconostocaceae;g__Weissella	0	0.0086797	0.00798066	0.00733988	0.00914572	0	0	0	0	0	0	0	0	0	0
d__Bacteria;p__Firmicutes;c__Clostridia;o__Clostridiales;f__Clostridiaceae;g__Clostridium	0	0.000699036	0.00125244	0.000291265	0.0092331	0.00104855	0.00215536	0.0019806	0	0.0119419	0.00270876	0	0.000145632	5.8253e-05	0.0015437
d__Bacteria;p__Tenericutes;c__Mollicutes;o__RF39;f__unidentified_RF39;g__unidentified_RF39	0.000436897	0.000174759	0.00305828	0.00125244	0.00058253	0.00614569	0.00104855	0.004835	0.000320391	0.00148545	0.00553403	0.000524277	0.00133982	0.000349518	0.00171846
d__Bacteria;p__Firmicutes;c__Erysipelotrichi;o__Erysipelotrichales;f__Erysipelotrichaceae;g__Clostridium	0	0	0.000961174	0	0.00180584	0	0.00110681	0.00157283	0.00355343	0.000873795	0	0.00148545	0.000116506	0.00500976	0.0105147
d__Bacteria;p__Firmicutes;c__Clostridia;o__Clostridiales;f__Ruminococcaceae;g__Anaerotruncus	0	0.00136895	0.00107768	0.000699036	0	0.000728162	0.00320391	0.00200973	0.0039612	0.00116506	0.00329129	0.00364081	0.000145632	0.00317479	0
d__Bacteria;p__Bacteroidetes;c__Bacteroidia;o__Bacteroidales;f__Prevotellaceae;g__Prevotella	5.8253e-05	5.8253e-05	0	0	0.000291265	5.8253e-05	0.00276702	0.00101943	0.00125244	0.000116506	8.73795e-05	0.00436897	0.000961174	0.00620394	0.00337867
d__Bacteria;p__Firmicutes;c__Clostridia;o__Clostridiales;f__Ruminococcaceae;g__Gemmiger	0.00710687	0.00145632	0	8.73795e-05	0.00128157	0.000291265	0	8.73795e-05	0.000844668	0.000815542	0.00678647	0	0.000174759	0.000844668	0.000203885
d__Bacteria;p__Firmicutes;c__Clostridia;o__Clostridiales;f__Ruminococcaceae;g__unclassified_Ruminococcaceae	0.000524277	0.000145632	0.000203885	0.00049515	0.000640783	0.000145632	0.00215536	0.0053884	0.000815542	0.00133982	0.000553403	0.00206798	0.00122331	0.00125244	0.00171846
d__Bacteria;p__Actinobacteria;c__Actinobacteria;o__Actinomycetales;f__Brevibacteriaceae;g__Brevibacterium	0	0.0018641	0.00276702	0.00206798	0.00987388	0	0	0	0	0	0	0	0	0	0
d__Bacteria;p__Firmicutes;c__Clostridia;o__Clostridiales;f__Lachnospiraceae;g__Clostridium	0.00305828	0	0.00107768	0	0.00352431	0.0024175	0.00171846	0.000320391	0.000669909	0.000349518	0.000757289	0.000262138	0.00101943	0.000873795	0.000262138
d__Bacteria;p__Deferribacteres;c__Deferribacteres;o__Deferribacterales;f__Deferribacteraceae;g__Mucispirillum	2.91265e-05	0.000291265	5.8253e-05	0.000233012	0.000174759	0.000262138	0.00454373	0.000116506	0.00591268	0.00122331	0.000436897	0.00110681	0	0.0018641	0
d__Bacteria;p__Firmicutes;c__Clostridia;o__Clostridiales;f__Lachnospiraceae;g__Roseburia	0	0.00337867	0	0	0	0.00390295	0.00404858	0	0.000961174	0.000349518	0.000349518	0.00133982	0	0.000436897	0
d__Bacteria;p__Firmicutes;c__Bacilli;o__Lactobacillales;f__Aerococcaceae;g__unidentified_Aerococcaceae	0.00943698	0.00224274	0	0	0	0	0	0	0	0	0.00177672	0.000116506	0.000320391	0.000262138	0.000553403
d__Bacteria;p__Firmicutes;c__Bacilli;o__Bacillales;f__unclassified_Bacillales;g__unclassified_Bacillales	0.00212623	0.0029709	0.00230099	0.00212623	0.0014272	0	0	5.8253e-05	0	0	0.00113593	0.000291265	5.8253e-05	5.8253e-05	0.000699036
d__Bacteria;p__Firmicutes;c__Clostridia;o__Clostridiales;f__Peptostreptococcaceae;g__unidentified_Peptostreptococcaceae	0.0028544	5.8253e-05	0	0	0.00661171	0	0	0	0	0	0.00200973	0	0	0.000349518	0
d__Bacteria;p__Bacteroidetes;c__Bacteroidia;o__Bacteroidales;f__Porphyromonadaceae;g__Parabacteroides	0	0	0.000174759	0.000262138	0	0.000961174	0.000990301	0	0.000233012	0	0	0.000145632	0.000728162	0.00466024	0.00209711
d__Bacteria;p__Firmicutes;c__Bacilli;o__Bacillales;f__Planococcaceae;g__Sporosarcina	0.00567967	0.00113593	0	0	0.0014272	0	0	0	0	0	0.000815542	0.000203885	2.91265e-05	8.73795e-05	0.000669909
